# Supplementary material
Source: PubMed Central journal article supplement (PMC5170873)
Supplement: NIHMS775618-supplement-Supplement1.pdf [file NIHMS775618-supplement-Supplement1.pdf]

## Supplementary Appendix

This appendix has been provided by the authors to give readers additional information about their work.

Supplement to: Buckner JC, Shaw EG, Pugh SL, et al. Radiation plus procarbazine, CCNU, and vincristine in low-grade glioma. *N Engl J Med* 2016;374:1344-55. DOI: 10.1056/NEJMoa1500925

## **Supplementary Appendix**

Supplement to: Buckner JC, Shaw EG, Pugh SL, et al. Radiation plus procarbazine, CCNU, and vincristine in low-grade glioma

### **Contents**

|                                                                                                                               |   |
|-------------------------------------------------------------------------------------------------------------------------------|---|
| Figure S1. Survival Figures                                                                                                   | 2 |
| Figure S2. Forest Plot of Hazard Ratios by Patient Subgroups                                                                  | 3 |
| Table S1. Neurologic Function (NF) Status                                                                                     | 4 |
| Table S2. Frequency of IDH1 R132H Mutations by Histologic Type                                                                | 5 |
| Table S3. Multivariable Analyses for Progression-free Survival and Overall Survival                                           | 6 |
| Table S4. Sensitivity Analyses to Assess Effect of Patients Lost to Follow Up on the<br>Treatment Effect for Overall Survival | 7 |
| Table S5. Post-progression Treatment by Treatment Arm                                                                         | 8 |
| Table S6. RTOG/EORTC Late Radiation Morbidity Scoring Scheme                                                                  | 9 |

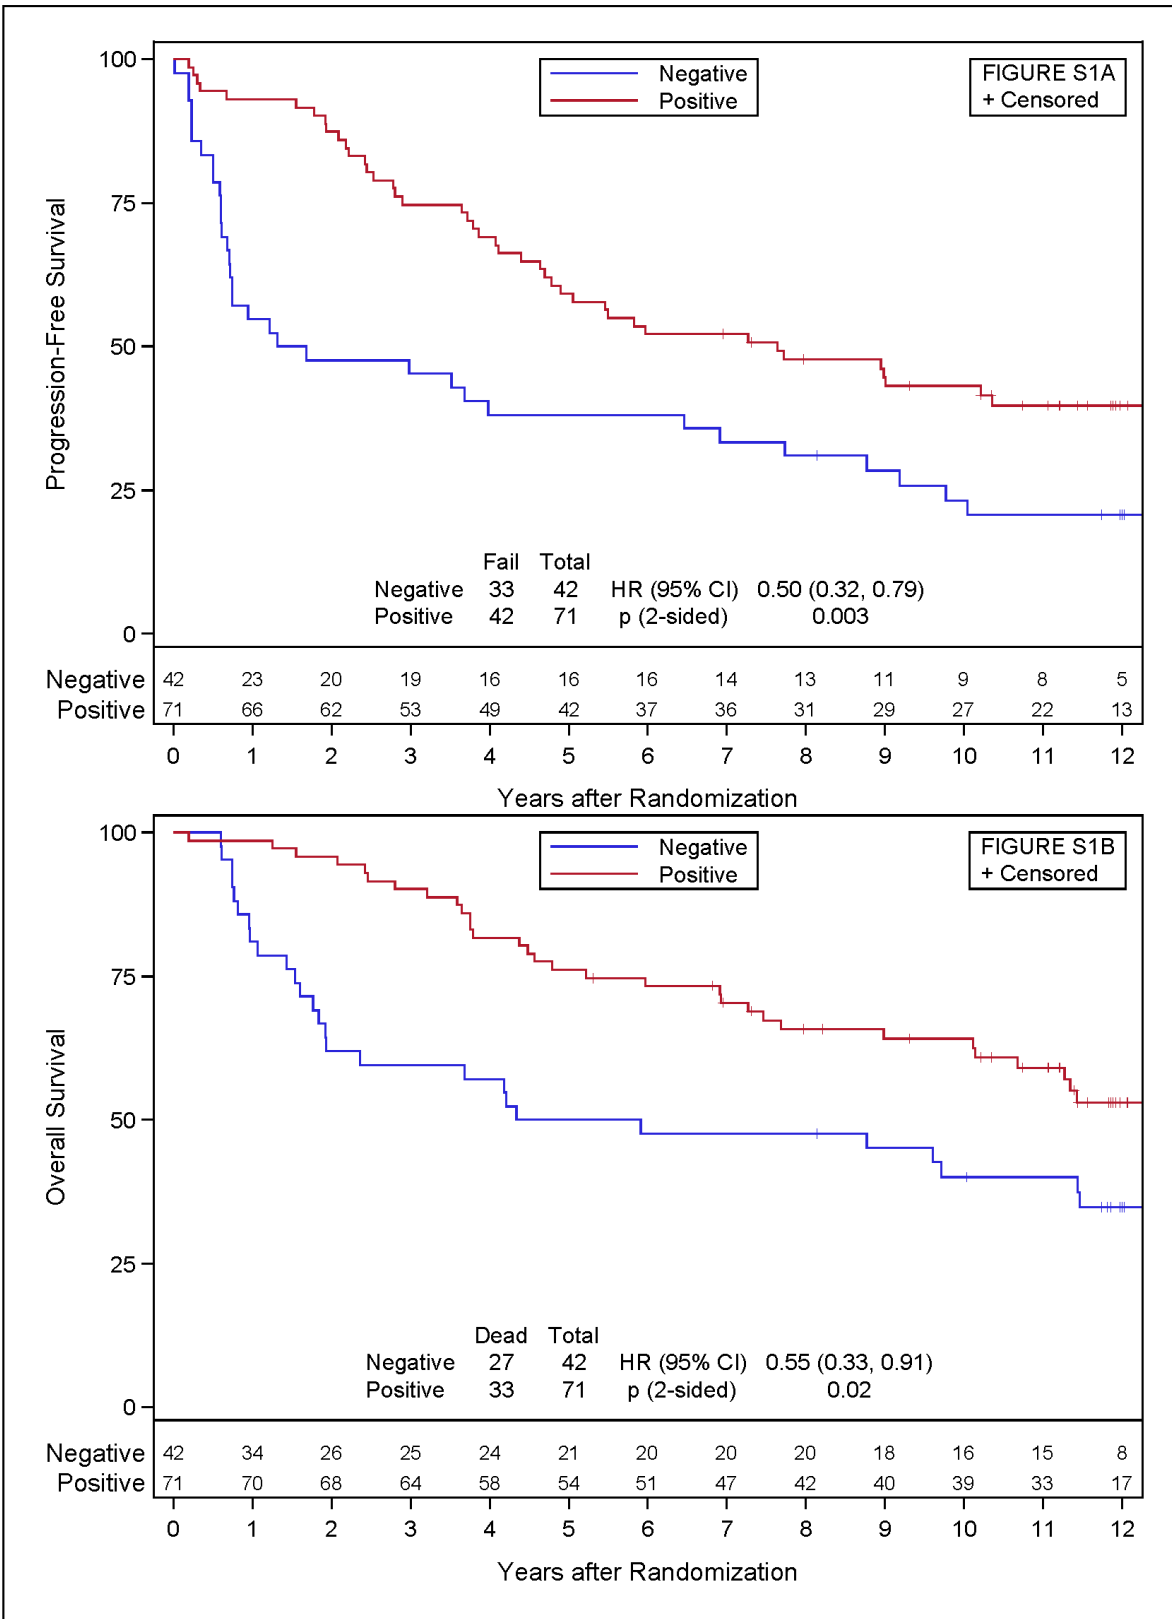

### Forest Plot of Hazard Ratios by Patient Subgroups

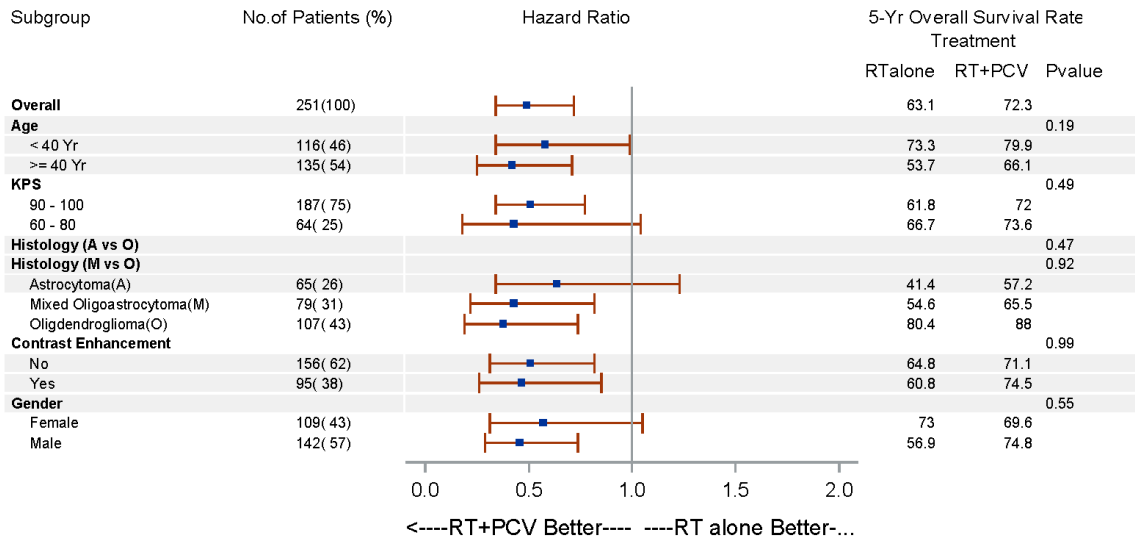

Due to time-varying treatment effect, hazard ratios are for treatment with > 1 year of follow-up  
 The p-value is from the test statistic for testing the interaction between the treatment with > 1 year of follow-up and any subgroup variable

**Table S1. Neurologic Function (NF) Status.**

| NF | Definition                                                                                                           |
|----|----------------------------------------------------------------------------------------------------------------------|
| 0  | No neurologic symptoms; fully active at home/work without assistance.                                                |
| 1  | Minor neurologic symptoms; fully active at home/work without assistance.                                             |
| 2  | Moderate neurologic symptoms; fully active at home/work but requires assistance.                                     |
| 3  | Moderate neurologic symptoms; less than fully active at home/work and requires assistance.                           |
| 4  | Severe neurologic symptoms; totally inactive requiring complete assistance at home or in institution-unable to work. |

**Table S2. Frequency of IDH1 132H Mutations by Histologic Type.**

| <b>IDH</b> | <b>Astrocytoma</b> |          | <b>Mixed</b> |          | <b>Oligodendroglioma</b> |          | <b>Total</b> |          |
|------------|--------------------|----------|--------------|----------|--------------------------|----------|--------------|----------|
|            | <b>n</b>           | <b>%</b> | <b>n</b>     | <b>%</b> | <b>n</b>                 | <b>%</b> | <b>n</b>     | <b>%</b> |
| Negative   | 13                 | 52.0     | 18           | 46.2     | 11                       | 22.4     | 42           | 37.2     |
| Positive   | 12                 | 48.0     | 21           | 53.8     | 38                       | 77.6     | 71           | 62.8     |



**Table S4. Sensitivity Analyses to Assess Effect of Patients Lost to Follow Up on the Treatment Effect for Overall Survival.**

|                                                                                         | Cases changed to deaths | Median survival (95% CI) |                     | 10 year estimates |        | Log-rank p-value |
|-----------------------------------------------------------------------------------------|-------------------------|--------------------------|---------------------|-------------------|--------|------------------|
|                                                                                         |                         | RT alone                 | RT+PCV              | RT alone          | RT+PCV |                  |
| 1) Keep patients lost to follow-up as censored                                          | 0                       | 7.8<br>(6.1, 9.8)        | 13.3<br>(10.6, NR)  | 40.1%             | 60.1%  | 0.002            |
| 2) Change patients lost to follow-up on RT+PCV arm                                      | 26                      | 7.8<br>(6.1, 9.8)        | 9.7<br>(7.7, 11.66) | 40.1%             | 49.6%  | 0.3159           |
| 3) Change patients lost to follow-up on RT alone arm                                    | 14                      | 7.1<br>(6.0, 9.0)        | 13.3<br>(10.6, NR)  | 35.7%             | 60.1%  | <0.0001          |
| 4) Change all patients lost to follow-up                                                | 40                      | 7.1<br>(6.0, 9.0)        | 9.7<br>(7.7, 11.6)  | 35.7%             | 49.6%  | 0.0313           |
| 5) Change patients lost to follow-up on RT+PCV arm (to balance number lost on each arm) | 12                      | 7.8<br>(6.1, 9.8)        | 11.6<br>(8.5, NR)   | 40.1%             | 56.5%  | 0.0183           |



**Table S5. Post-progression Treatment by Treatment Arm.**

|                                   | <b>RT Alone<br/>(n=126)</b> | <b>RT + PCV<br/>(n=125)</b> |
|-----------------------------------|-----------------------------|-----------------------------|
| Cases with progression            | 92 (73%)                    | 49 (39%)                    |
|                                   | n                           | n                           |
| Resected                          | 33 (26%)                    | 17 (14%)                    |
| Salvage chemotherapy              | 71 (56%)                    | 29 (23%)                    |
| Salvage radiotherapy/radiosurgery | 24 (19%)                    | 7 (6%)                      |

RT=radiation therapy

PCV= procarbazine, CCNU, and vincristine

**Table S6. RTOG/EORTC Late Radiation Morbidity Scoring Scheme.**

| <b>Organ Tissue</b>        | <b>0</b> | <b>Grade 1</b>                                                                                           | <b>Grade 2</b>                                                                                                       | <b>Grade 3</b>                                                                                                                 | <b>Grade 4</b>                                                      | <b>Grade 5</b>                              |
|----------------------------|----------|----------------------------------------------------------------------------------------------------------|----------------------------------------------------------------------------------------------------------------------|--------------------------------------------------------------------------------------------------------------------------------|---------------------------------------------------------------------|---------------------------------------------|
| <b>Skin</b>                | None     | Slight atrophy; Pigmentation change; Some hair loss                                                      | Patch atrophy; Moderate telangiectasia; Total hair loss                                                              | Marked atrophy; Gross telangiectasia                                                                                           | Ulceration                                                          | Death directly related to radiation effects |
| <b>Subcutaneous Tissue</b> | None     | Slight induration (fibrosis) and loss of subcutaneous fat                                                | Moderate fibrosis but asymptomatic; Slight field contracture; <10% linear reduction                                  | Severe induration and loss of subcutaneous tissue; Field contracture > 10% linear measurement                                  | Necrosis                                                            |                                             |
| <b>Mucous Membrane</b>     | None     | Slight atrophy and dryness                                                                               | Moderate atrophy and telangiectasia; Little mucous                                                                   | Marked atrophy with complete dryness; Severe telangiectasia                                                                    | Ulceration                                                          |                                             |
| <b>Salivary Glands</b>     | None     | Slight dryness of mouth; Good response on stimulation                                                    | Moderate dryness of mouth; Poor response on stimulation                                                              | Complete dryness of mouth; No response on stimulation                                                                          | Fibrosis                                                            |                                             |
| <b>Spinal Cord</b>         | None     | Mild L'Hermitte's syndrome                                                                               | Severe L'Hermitte's syndrome                                                                                         | Objective neurological findings at or below cord level treated                                                                 | Mono, para quadriplegia                                             |                                             |
| <b>Brain</b>               | None     | Mild headache; Slight lethargy                                                                           | Moderate headache; Great lethargy                                                                                    | Severe headaches; Severe CNS dysfunction (partial loss of power or dyskinesia)                                                 | Seizures or paralysis; Coma                                         |                                             |
| <b>Eye</b>                 | None     | Asymptomatic cataract; Minor corneal ulceration or keratitis                                             | Symptomatic cataract; Moderate corneal ulceration; Minor retinopathy or glaucoma                                     | Severe keratitis; Severe retinopathy or detachment<br>Severe glaucoma                                                          | Panophthalmitis/Blindness                                           |                                             |
| <b>Larynx</b>              | None     | Hoarseness; Slight arytenoid edema                                                                       | Moderate arytenoid edema; Chondritis                                                                                 | Severe edema; Severe chondritis                                                                                                | Necrosis                                                            |                                             |
| <b>Lung</b>                | None     | Asymptomatic or mild symptoms (dry cough); Slight radiographic appearances                               | Moderate symptomatic fibrosis or pneumonitis severe cough); Low grade fever; Patchy radiographic appearances         | Severe symptomatic fibrosis or pneumonitis; Dense radiographic changes                                                         | Severe respiratory insufficiency/continuous O2/Assisted ventilation |                                             |
| <b>Heart</b>               | None     | Asymptomatic or mild symptoms; Transient T wave inversion & ST Changes; Sinus tachycardia >110 (at rest) | Moderate angina on effort; Mild pericarditis; Normal heart size; Persistent abnormal T wave and ST changes ; Low QRS | Severe angina; Pericardial effusion; Constrictive pericarditis; Moderate heart failure; Cardiac enlargement; EKG abnormalities | Tamponade/Severe heart failure/Severe constrictive pericarditis     |                                             |
| <b>Esophagus</b>           | None     | Mild fibrosis; Slight difficulty in swallowing solids; No pain on swallowing                             | Unable to take solid food normally; Swallowing semi-solid food; Dilation may be indicated                            | Severe fibrosis; Able to swallow only liquids; May have pain on swallowing; Dilation required                                  | Necrosis/Perforation Fistula                                        |                                             |

| <b>Organ Tissue</b>          | <b>0</b> | <b>Grade 1</b>                                                                                                                                | <b>Grade 2</b>                                                                                                                                                   | <b>Grade 3</b>                                                                                                                                       | <b>Grade 4</b>                                                               | <b>Grade 5</b> |
|------------------------------|----------|-----------------------------------------------------------------------------------------------------------------------------------------------|------------------------------------------------------------------------------------------------------------------------------------------------------------------|------------------------------------------------------------------------------------------------------------------------------------------------------|------------------------------------------------------------------------------|----------------|
| <b>Small/Large Intestine</b> | None     | Mild diarrhea; Mild cramping; Bowel movement 5 times daily Slight rectal discharge or bleeding                                                | Moderate diarrhea and colic; Bowel movement >5 times daily; Excessive rectal mucus or intermittent bleeding                                                      | Obstruction or bleeding, requiring surgery                                                                                                           | Necrosis/Perforation Fistula                                                 |                |
| <b>Liver</b>                 | None     | Mild lassitude; Nausea, dyspepsia; Slightly abnormal liver function                                                                           | Moderate symptoms; Some abnormal liver; function tests; Serum albumin normal                                                                                     | Disabling hepatic insufficiency; Liver function tests grossly abnormal; Low albumin; Edema or ascites                                                | Necrosis/Hepatic coma or encephalopathy                                      |                |
| <b>Kidney</b>                | None     | Transient albuminuria; No hypertension; Mild impairment of renal function; Urea 25-35 mg%; Creatinine 1.5-2.0 mg%; Creatinine clearance > 75% | Persistent moderate albuminuria (2+); Mild hypertension; No related anemia; Moderate impairment of renal function; Urea > 36-60mg% Creatinine clearance (50-74%) | Severe albuminuria; Severe hypertension Persistent anemia (< 10%); Severe renal failure; Urea >60 mg% Creatinine >4.0 mg% Creatinine clearance < 50% | Malignant hypotension; Uremic coma/Urea > 100%                               |                |
| <b>Bladder</b>               | None     | Slight epithelial atrophy; Minor telangiectasia (microscopic hematuria)                                                                       | Moderate frequency; Generalized telangiectasia; Intermittent macroscopic hematuria                                                                               | Severe frequency & dysuria Severe generalized Telangiectasia (often with petechiae); Frequent hematuria; Reduction in bladder capacity (< 150 cc)    | Necrosis/Contracted bladder (capacity < 100 cc); Severe hemorrhagic cystitis |                |
| <b>Bone</b>                  | None     | Asymptomatic; No growth retardation; Reduced bone Density                                                                                     | Moderate pain or tenderness; Growth retardation; Irregular bone sclerosis                                                                                        | Severe pain or tenderness; Complete arrest of bone growth; Dense bone sclerosis                                                                      | Necrosis/Spontaneous fracture                                                |                |
| <b>Joint</b>                 | None     | Mild joint stiffness; Slight limitation of movement                                                                                           | Moderate stiffness; Intermittent or moderate joint pain; Moderate limitation of movement                                                                         | Severe joint stiffness; Pain with severe limitation of movement                                                                                      | Necrosis/Complete fixation                                                   |                |
